# Supplementary material
Source: PubMed Central journal article supplement (PMC5330282)
Supplement: NIHMS835484-supplement-2.pdf [file NIHMS835484-supplement-2.pdf]

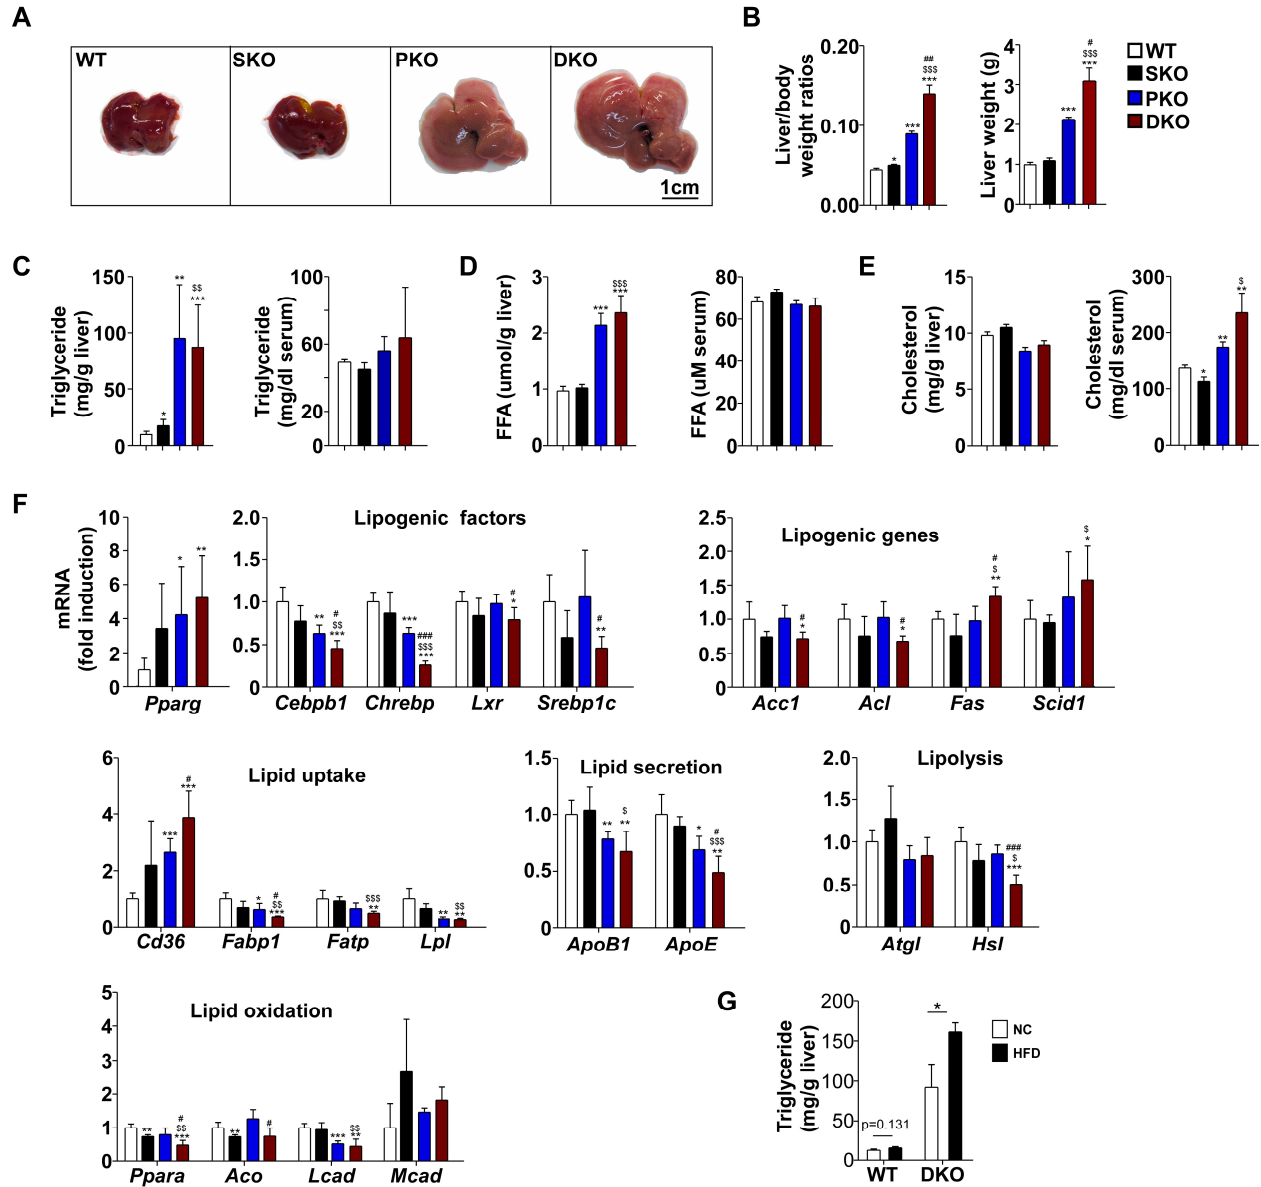

**Figure S1. DKO mice develop hepatic steatosis, related to Figure 2.** (A) Macroscopic view of representative livers. (B) Liver/body weight ratios and liver weight were compared (n=6). (C, D, E) Hepatic and serum triglycerides, free fatty acids and cholesterol levels were determined and compared among 2-month-old mice (n=6). (F) mRNA levels of key genes in lipid metabolism was determined using qPCR and compared among 1-month-old mice (n=5). (G) 1-month-old WT and DKO mice were fed high fat diet for 1 month. Hepatic triglycerides were measured and compared among normal chow (NC) and high fat diet (HFD) fed WT and DKO mice (n=5-6). Data are shown as means  $\pm$  S.D. (A-F) \*, \*\*, or \*\*\* indicates SKO, PKO or DKO vs. WT. \$, \$\$, or \$\$\$ indicates DKO vs. SKO. # or ### indicates DKO vs. PKO. \*, \$ or # indicates p<0.05. \*\* or \$\$ indicates p<0.01. \*\*\*, \$\$\$ or ### indicates p<0.001. (G) \* indicates p<0.05.

## Shp2 & Pten Cooperate to Suppress Liver Cancer

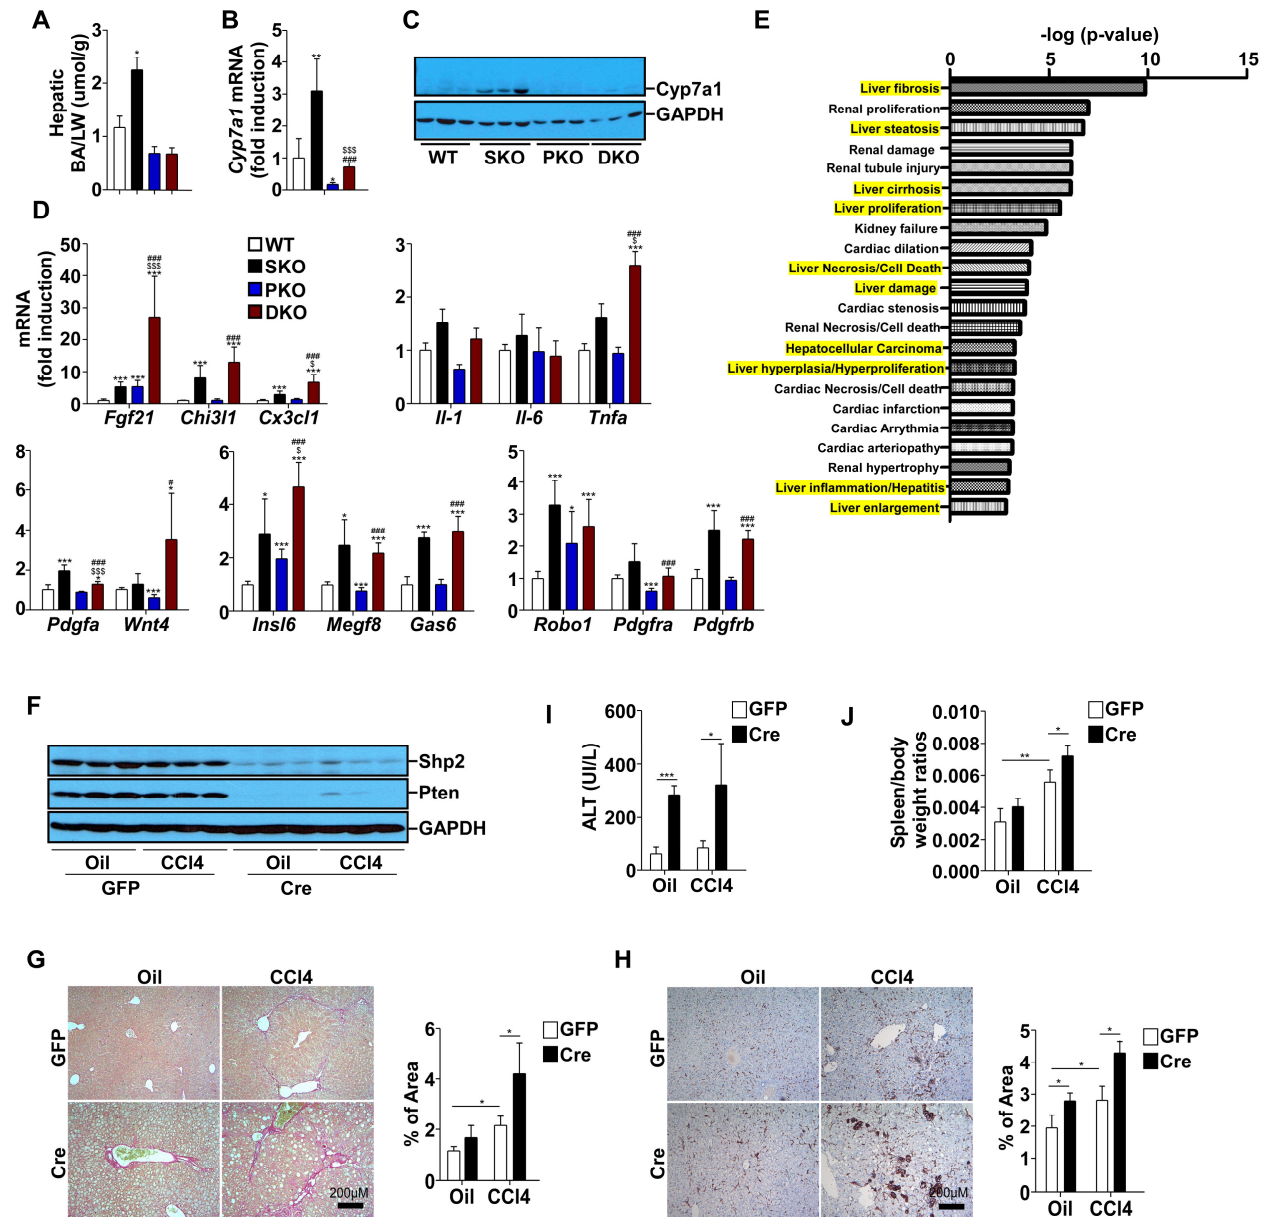

**Figure S2. Dual deletion of *Shp2* and *Pten* in hepatocytes leads to early-onset NASH, related to Figure 3.** (A) Hepatic bile acid levels were determined and compared (n=6). (B) mRNA level of *Cyp7a1* was determined by qPCR and compared (n=5). (C) *Cyp7a1* was determined by immunoblot in liver lysates. (D) mRNA levels of secretory factors and related receptors were determined by qPCR and compared (n=5). (E) Analysis of toxicogenomics changes in DKO livers. Bar chart was generated using IPA-Tox® with microarray data (DKO vs. WT). Toxicology changes related to liver were highlighted. All samples used in this figure were obtained from 2-month-old mice. (A, B, D) Data are shown as means  $\pm$  S.D. \*, \*\*, or \*\*\* indicates SKO, PKO or DKO vs. WT. \$ or \$\$\$ indicates DKO vs. SKO. ### indicates DKO vs. PKO. \* or \$ indicates  $p < 0.05$ . \*\* indicates  $p < 0.01$ . \*\*\*, \$\$\$ or ### indicates  $p < 0.001$ . (F-J) 2~3-month-old WT (*Pten*<sup>fl/fl</sup>.*Shp2*<sup>fl/fl</sup>.*Alb-Cre*) were infected with AAV-GFP or AAV-Cre. One week after infection, mice were I.P. with olive oil or CCL4 twice a week for 4 weeks. (F) Expression of *Shp2* and *Pten* was examined by immunoblot analysis of liver lysates. (G, H) Right, Picro-Sirius Red staining (G) and F4/80 (H) immunostaining of liver sections. Left, quantification of percentage of positive Sirius Red and F4/80 staining area (n=3~4). (I) Serum ALT was measured and compared (n=3~4). (J) Spleen/body weight ratios were compared (n=3~4). Data are presented as Mean $\pm$ SD. (\* $p < 0.05$ , \*\* $p < 0.01$ , \*\*\* $p < 0.001$ )

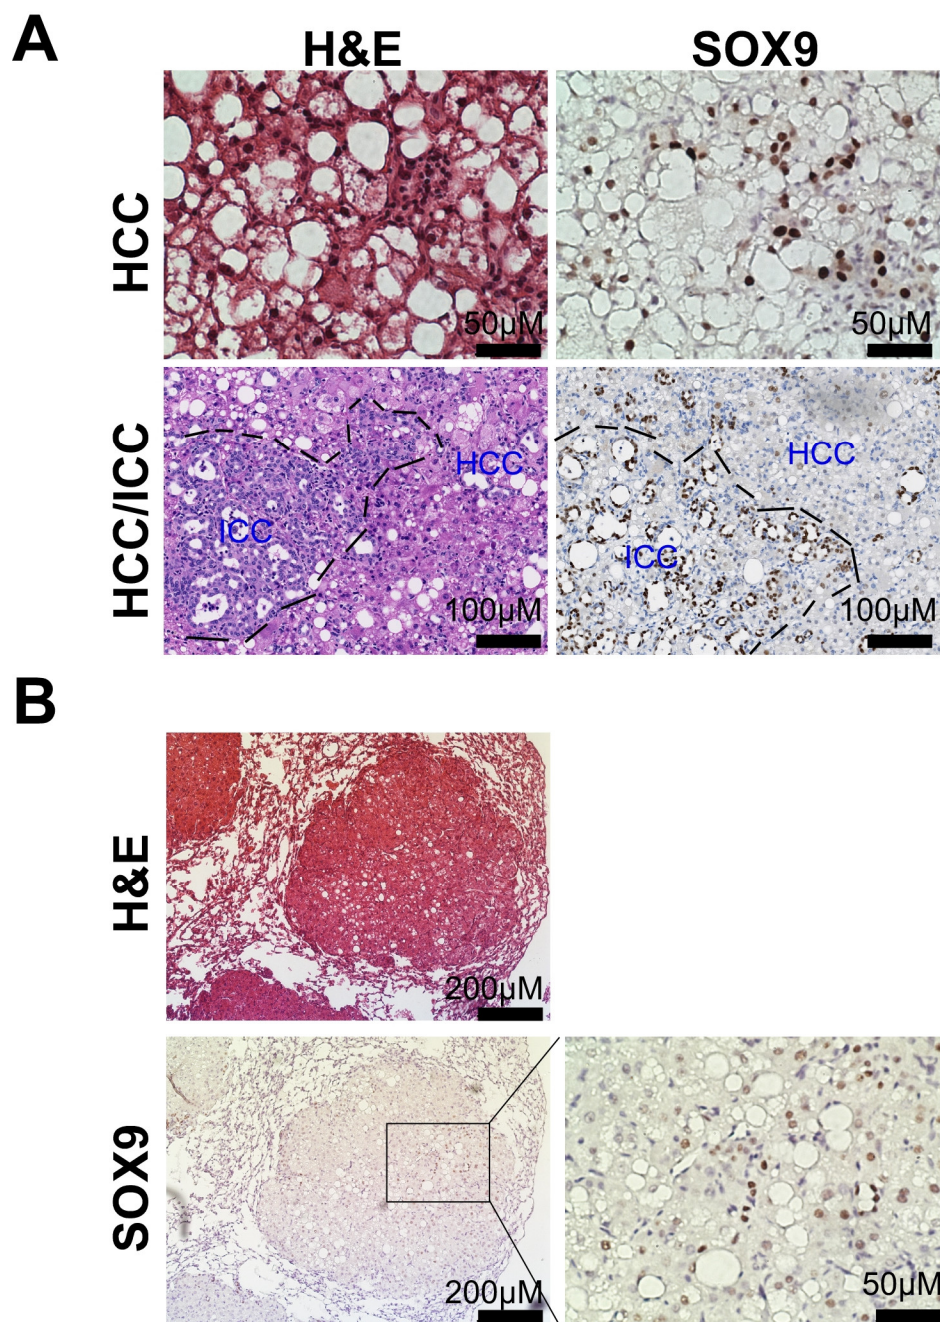

**Figure S3. Microscopic view of representative tumors in *MUP-uPA* mice, related to Figure 4.** Data are from *MUP-uPA* mice 5 months after transplantation with *DKO* hepatocytes. **(A)** Representative H&E and SOX9 staining on sections of tumors. **(B)** H&E and SOX9 immunostaining on lung sections.

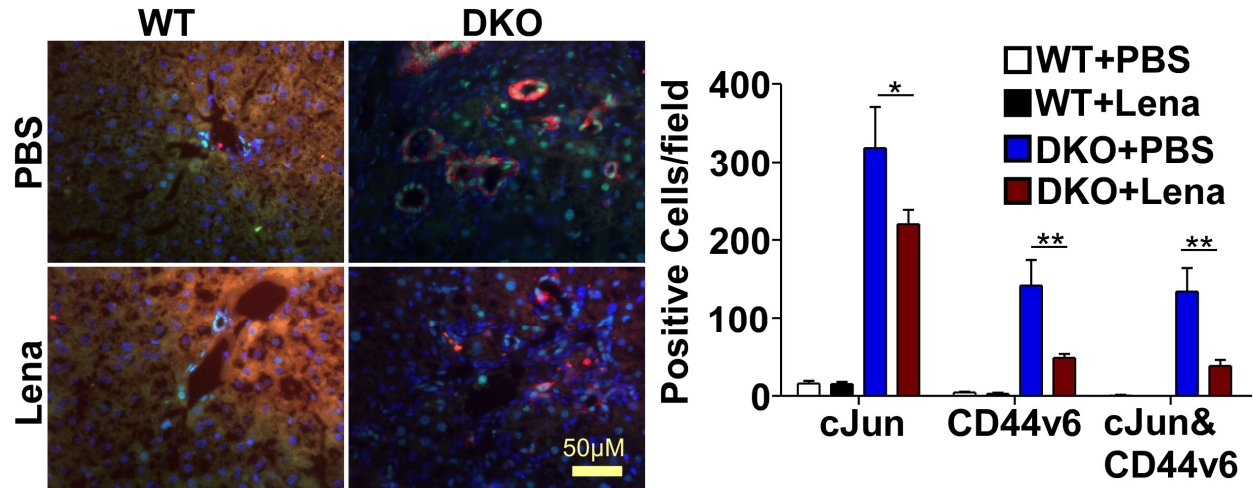

**Figure S4. Lenalidomide treatment reduces liver TIC population in *DKO* mice, related to Figure 5.** Left, representative co-immunostaining of CD44v6/cJun on liver sections. Right, quantification of cJun, CD44v6 and cJun/CD44v6 positive cells (n=3). Lena: lenalidomide. Data are shown as means  $\pm$  S.D.. \* indicates  $p < 0.05$ . \*\* indicates  $p < 0.01$ .

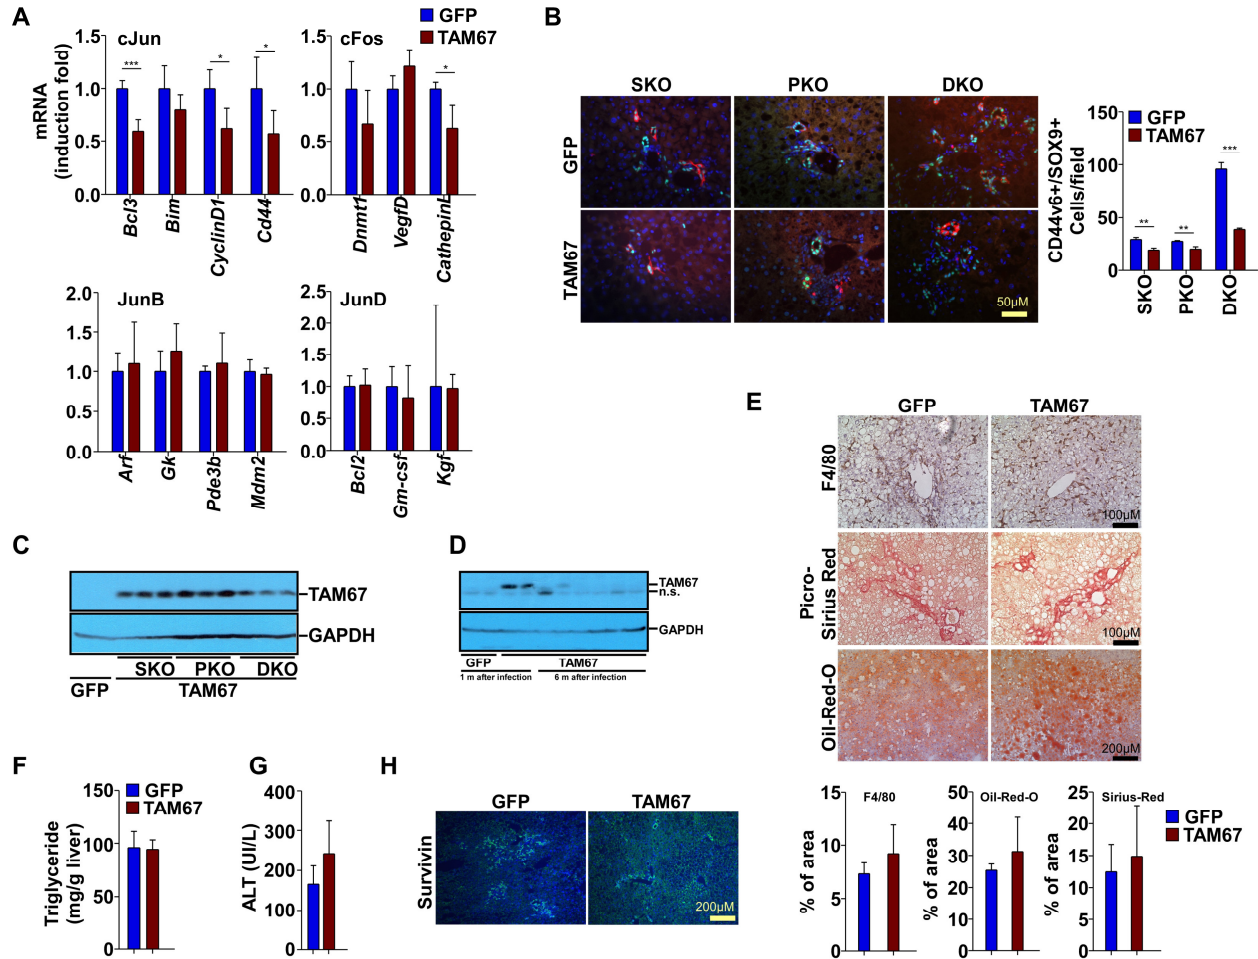

**Figure S5. TAM67 overexpression does not suppress NASH in DKO mice, related to Figure 6.** (A) mRNA levels of cJun, cFos, JunB and JunD downstream targets were determined by qPCR and compared between mice infected with AAV-GFP or AAV-TAM67 (n = 4). (B) Left, representative co-immunostaining of CD44v6/SOX9 on liver sections from SKO, PKO and DKO mice infected with AAV-GFP or AAV-TAM67. Right, quantification of CD44v6/SOX9 positive cells (n=4). (C, D) TAM67 expression was determined by immunoblot analysis of liver lysates. (E) Top, immunostaining for F4/80, Picro-Sirius Red and Oil-Red-O staining were performed on liver sections from mice infected with AAV-GFP or AAV-TAM67. Bottom, quantification of percentage of positive F4/80, Sirius Red, and Oil-Red-O staining area (n=5). (F, G) Liver triglyceride and serum ALT levels were determined and compared between mice infected with AAV-GFP or AAV-TAM67 (n=6). (H) Immunostaining for Survivin was performed on liver sections from mice infected with AAV-GFP or AAV-TAM67. Data are shown as means  $\pm$  S.D.. \* indicates  $p < 0.05$ . \*\* indicates  $p < 0.01$ . \*\*\* indicates  $p < 0.001$ .

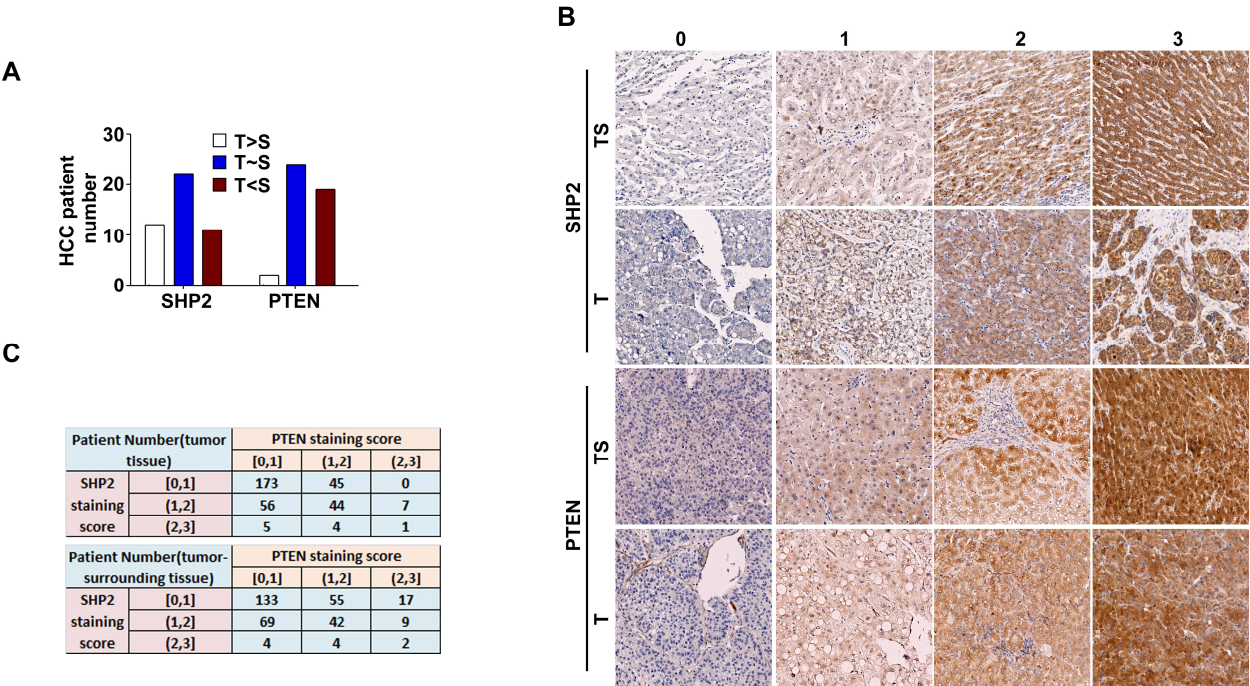

**Figure S6. Analysis of SHP2 and PTEN expression in HCC patients, related to Figure 7.** (A) Expression of SHP2 and PTEN was analyzed by immunostaining and compared in 45 pairs of human HCC and tumor-surrounding tissuearray samples. Liver cancer tissue array (LV1504) was purchased from US Biomax (T: tumor; S: tumor-surrounding tissue). (B) Tissue microarray (TMA) of paired human HCC tumor and tumor-surrounding tissue were stained for SHP2 or PTEN and scanned with Hamamatsu Slide Scanner (Microscopy Core, UCSD) (20X objective was used). Representative TMA images are shown here. Score: 0: negative staining; 1: weak staining; 2: moderate staining; 3: strong staining. (C) 3x3 matrix representation of PTEN and SHP2 status in tumor and tumor surrounding tissues.

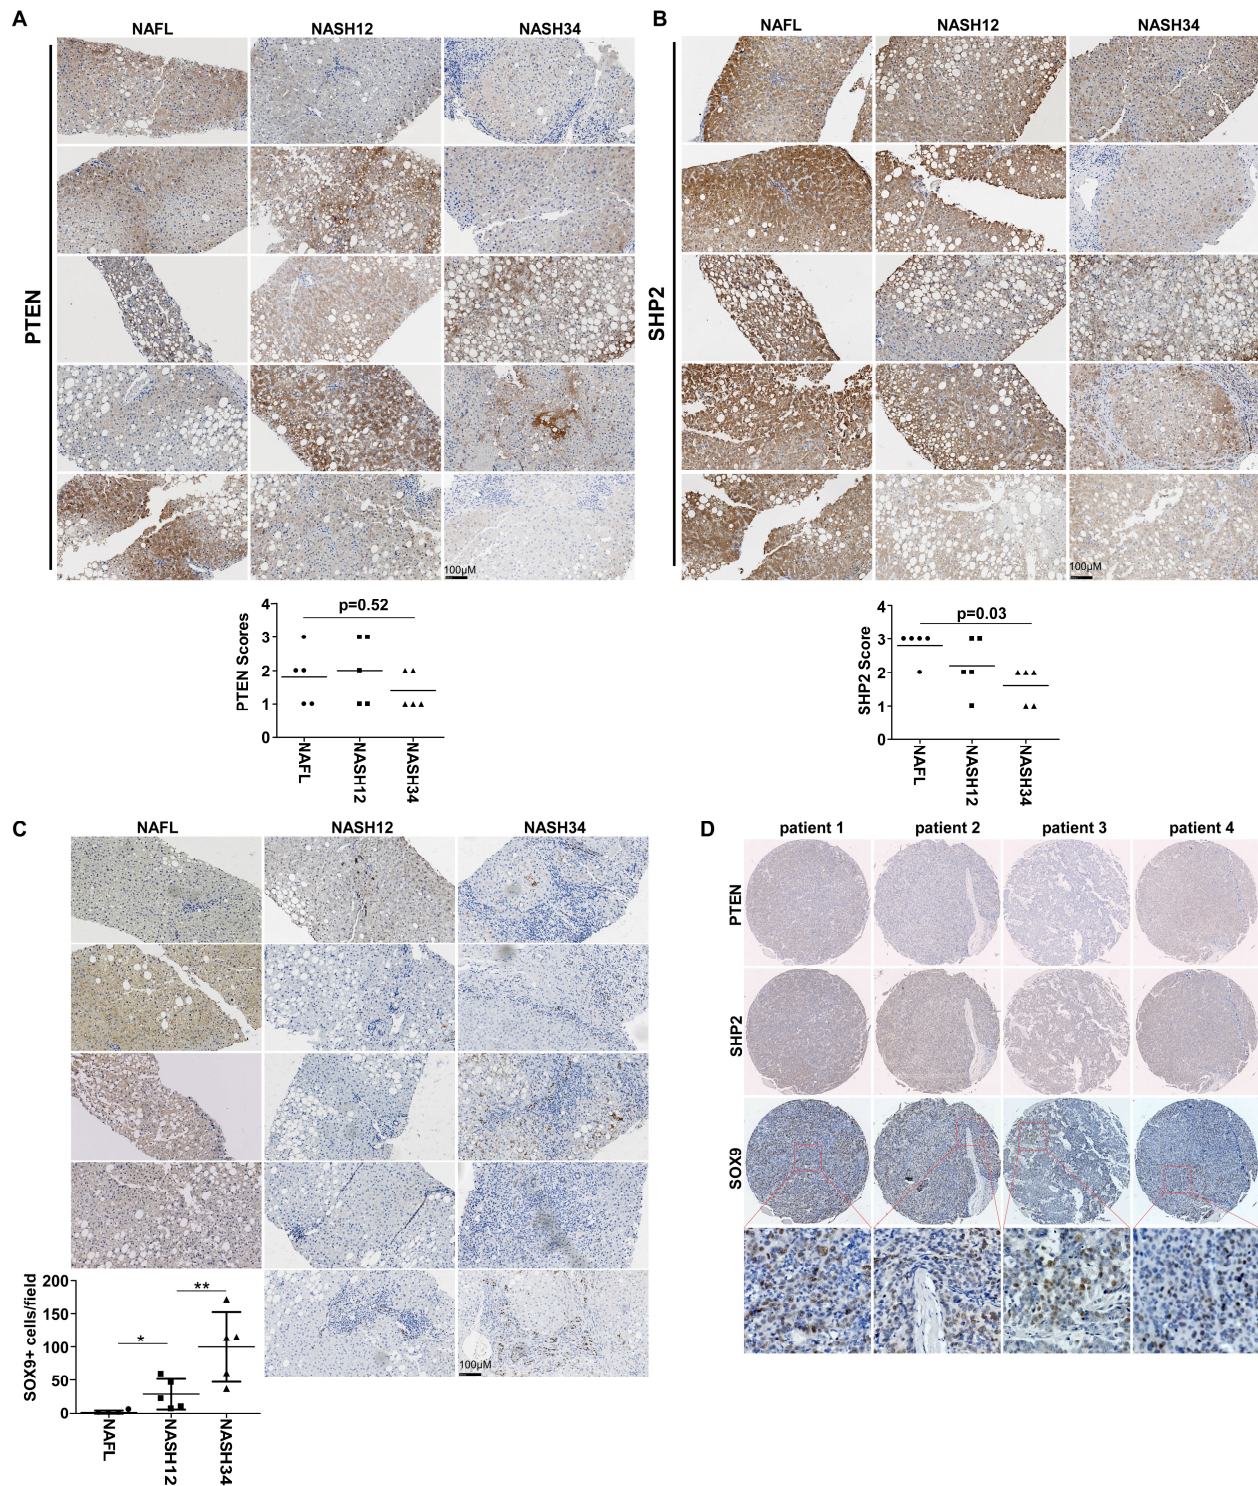

**Figure S7. Analysis of SHP2, PTEN and SOX9 expression in NASH or HCC patients, correlated to Figure 7.** (A-B) Expression of PTEN (A) and SHP2 (B) was analyzed by immunostaining and compared in NAFL, NASH12 (less severe NASH patients) and NASH34 (more severe NASH patients) human patients (n=5). Representative images are shown here. Scores from 0 to 3 were given to each sample with 0: negative staining; 1: weak staining; 2: moderate staining; 3: strong staining. Data are shown as means  $\pm$  S.D.. p-value was calculated using one-way ANOVA. (C) Expression of SOX9 was analyzed by immunostaining and compared in NAFL, NASH12 and

### *Shp2 & Pten Cooperate to Suppress Liver Cancer*

NASH34 (NAFL: simple steatosis; NASH12 with stage 1-2 fibrosis; and NASH34: NASH with stage 3-4 fibrosis) human patients (n=4~5). Data are shown as means  $\pm$  S.D.. \*,  $p < 0.05$ . \*\*,  $p < 0.01$ . **(D)** Expression of SHP2, PTEN and SOX9 was analyzed by immunostaining and compared in 350 pairs of human HCC samples.

See also Table S6.

**Table S1**, related to Figure 1, Tumor incidences in mice of various genotypes

| Genotype | Age (mo) of | NO. of mice | Tumor                                                     |
|----------|-------------|-------------|-----------------------------------------------------------|
| WT       | 1-18        | 60          | Not observed                                              |
| SKO      | 1-11        | 37          | Not observed                                              |
|          | 12          | 6           | HCA (2)                                                   |
|          | 18          | 7           | HCA (6)                                                   |
| PKO      | 1-3         | 13          | Not observed                                              |
|          | 4-6         | 15          | Not observed                                              |
|          | 7           | 12          | Bile ductal hyperplasia (6);HCA (3); ICC (1)              |
|          | 9           | 7           | HCA (4);ICC (4)                                           |
|          | 12          | 11          | HCA (11);ICC (11)                                         |
|          | 13-16       | 7           | HCA (7); ICC (7); HCC (3);HCC/ICC (2)                     |
| DKO      | 1-2         | 11          | Not observed                                              |
|          | 4-5         | 9           | HCA (6); HCC (2)                                          |
|          | 7           | 10          | HCA (10); ICC (2); HCC (6);HCC/ICC (2)                    |
|          | 12          | 11          | HCA (11);ICC (9); HCC (9);HCC/ICC (9);lung metastasis (3) |

**Table S2** , related to Figure 5,Oncogene with altered expression

| <b>ILMN_Gene</b>   | <b>Fold change</b> | <b>P-value</b> |
|--------------------|--------------------|----------------|
| <b><i>cJun</i></b> | <b>2.55</b>        | <b>0.005</b>   |
| <i>Kras</i>        | 1.33               | 0.009          |
| <i>Nras</i>        | 1.58               | 0.009          |
| <i>Lmo2</i>        | 3.83               | 0.018          |
| <i>Tpr</i>         | 1.74               | 0.021          |
| <i>Bcl2</i>        | 1.32               | 0.042          |
| <i>Pparg</i>       | 1.16               | 0.043          |
| <i>Mdm2</i>        | 1.06               | 0.047          |
| <i>Ccnd1</i>       | 2.29               | 0.047          |

*Shp2 & Pten Cooperate to Suppress Liver Cancer*

**Table S3** , related to Figure 7, HCC patients information

Table S3 , related to Figure 7, HCC patients information

| Characteristics                     | Parameters    | Number              |                      | P-Value  | Statistical Method          |
|-------------------------------------|---------------|---------------------|----------------------|----------|-----------------------------|
|                                     |               | SHP2 <sup>Low</sup> | SHP2 <sup>High</sup> |          |                             |
| SHP2 staining score                 | Mean (SD)     | 0.65 (0.42)         | 1.73 (0.40)          | 1.94E-72 | Two-tailed Student's t test |
| Overall Survival Time (Months)      | Mean (SD)     | 34.3 (14.4)         | 38.2 (12.8)          | 0.0126   |                             |
| Disease-Free Survival Time (Months) | Mean (SD)     | 29.3 (19.8)         | 34.2 (19.6)          | 0.0301   |                             |
| Sex distribution                    | Male          | 193                 | 104                  | 0.5995   | χ2 tests                    |
|                                     | Female        | 37                  | 16                   |          |                             |
| Age (years)                         | Range         | 10–78               | 16–79                | 0.4949   |                             |
|                                     | Median        | 53                  | 53                   |          |                             |
|                                     | Mean (SD)     | 52.28 (11.29)       | 53.17 (12.00)        |          |                             |
| HBV                                 | N/A           | 6                   | 3                    | 0.9996   |                             |
|                                     | HBV (-)       | 33                  | 18                   |          |                             |
|                                     | HBV (+)       | 191                 | 99                   |          |                             |
| Cirrhosis                           | Cirrhosis (-) | 24                  | 16                   | 0.5274   |                             |
|                                     | Cirrhosis (+) | 206                 | 104                  |          |                             |
| TNM stage                           | T1            | 151                 | 91                   | 0.1463   |                             |
|                                     | T2            | 73                  | 27                   |          |                             |
|                                     | T3            | 6                   | 2                    |          |                             |
| Differentiation stage               | N/A           | 1                   | 0                    | 0.3876   |                             |
|                                     | Grade1        | 3                   | 3                    |          |                             |
|                                     | Grade2        | 162                 | 92                   |          |                             |
|                                     | Grade3        | 63                  | 24                   |          |                             |
|                                     | Grade4        | 1                   | 1                    |          |                             |
| Tumor Number                        | N/A           | 4                   | 1                    | 0.9864   |                             |
|                                     | Single        | 201                 | 105                  |          |                             |
|                                     | Multiple      | 25                  | 14                   |          |                             |
| Tumor Size (cm)                     | Mean (SD)     | 5.6 (3.7)           | 4.6 (3.2)            | 0.0072   | Two-tailed Student's t test |
| AFP (ng/ml)                         | Mean (SD)     | 6773 (16409)        | 2672 (10421)         | 0.0133   |                             |
| ALT(U/L)                            | Mean (SD)     | 65.6 (110.7)        | 45.9 (38.4)          | 0.06     |                             |

| Table S4 , related to Figure 7, HCC patients information |               |                     |                      |          |                             |
|----------------------------------------------------------|---------------|---------------------|----------------------|----------|-----------------------------|
| Characteristics                                          | Parameters    | Number              |                      | P-Value  | Statistical Method          |
|                                                          |               | PTEN <sup>Low</sup> | PTEN <sup>High</sup> |          |                             |
| PTEN staining score                                      | Mean (SD)     | 0.16 (0.24)         | 1.34 (0.50)          | 3.52E-93 | Two-tailed Student's t test |
| Overall Survival Time (Months)                           | Mean (SD)     | 33.6 (14.5)         | 40.2 (11.3)          | 6.79E-05 |                             |
| Disease-Free Survival Time (Months)                      | Mean (SD)     | 28.8 (17.9)         | 36.3 (23.6)          | 0.0013   |                             |
| Sex distribution                                         | Male          | 193                 | 91                   | 0.1061   | χ2 tests                    |
|                                                          | Female        | 41                  | 10                   |          |                             |
| Age (years)                                              | Range         | 13--79              | 16--79               | 0.3112   |                             |
|                                                          | Median        | 53                  | 52                   |          |                             |
|                                                          | Mean (SD)     | 53.1 (11.1)         | 51.7 (11.6)          |          |                             |
| HBV                                                      | N/A           | 8                   | 1                    | 1        |                             |
|                                                          | HBV (-)       | 35                  | 15                   |          |                             |
|                                                          | HBV (+)       | 191                 | 85                   |          |                             |
| Cirrhosis                                                | Cirrhosis (-) | 26                  | 14                   | 0.5869   |                             |
|                                                          | Cirrhosis (+) | 208                 | 87                   |          |                             |
| TNM stage                                                | T1            | 157                 | 75                   | 0.345    |                             |
|                                                          | T2            | 71                  | 25                   |          |                             |
|                                                          | T3            | 6                   | 1                    |          |                             |
| Differentiation stage                                    | N/A           | 1                   | 0                    | 0.0251   |                             |
|                                                          | Grade1        | 1                   | 5                    |          |                             |
|                                                          | Grade2        | 170                 | 74                   |          |                             |
|                                                          | Grade3        | 60                  | 22                   |          |                             |
|                                                          | Grade4        | 2                   | 0                    |          |                             |
| Tumor Number                                             | N/A           | 3                   | 2                    | 0.7973   |                             |
|                                                          | Single        | 207                 | 87                   |          |                             |
|                                                          | Multiple      | 24                  | 12                   |          |                             |
| Tumor Size (cm)                                          | Mean (SD)     | 5.4 (3.7)           | 5.0 (3.3)            | 0.407    | Two-tailed Student's t test |
| AFP (ng/ml)                                              | Mean (SD)     | 6020 (15584)        | 2957 (10817)         | 0.0733   |                             |
| ALT (U/L)                                                | Mean (SD)     | 63.5 (104.6)        | 49.1 (66.2)          | 0.2      |                             |

Table S5, related to Figure 7, HCC patients information

| <b>Table S6</b> , related to Figure S7, NAFL and NASH patients information |                   |               |               |               |                |                           |
|----------------------------------------------------------------------------|-------------------|---------------|---------------|---------------|----------------|---------------------------|
| <b>Characteristics</b>                                                     | <b>Parameters</b> | <b>Number</b> |               |               | <b>P-Value</b> | <b>Statistical Method</b> |
|                                                                            |                   | <b>NAFL</b>   | <b>NASH12</b> | <b>NASH34</b> |                |                           |
| Sex distribution                                                           | Male              | 3             | 2             | 0             | 0.1225         | $\chi^2$ tests            |
|                                                                            | Female            | 2             | 3             | 5             |                |                           |
| Age (years)                                                                | Range             | 33–65         | 35–66         | 53–65         | 0.3462         | One-way ANOVA             |
|                                                                            | Median            | 47            | 61            | 60            |                |                           |
|                                                                            | Mean (SD)         | 48.4 (12.5)   | 52 (15.2)     | 59.4 (4.4)    |                |                           |
| BMI                                                                        | Mean (SD)         | 30.8 (4.1)    | 31.6 (4.0)    | 29.5 (5.8)    | 0.785          |                           |
| ALT (U/L)                                                                  | Mean (SD)         | 41.8 (19.5)   | 39.4 (22.1)   | 45 (21.45)    | 0.9155         |                           |
| Serum glucose (mg/dL)                                                      | Mean (SD)         | 94.8 (13.8)   | 100.2 (24.4)  | 152 (77.9)    | 0.1551         |                           |
| Serum insulin (mIU/L)                                                      | Mean (SD)         | 17.4 (6.3)    | 23.6 (6.5)    | 27.2 (15.3)   | 0.3447         |                           |
| Serum triglycerides (mg/dL)                                                | Mean (SD)         | 183.6 (74.6)  | 149.4 (55.8)  | 142.5 (91.2)  | 0.6665         |                           |

**Table S7**, List of primers and antibodies
